# Supplementary material for: Escherichia coli CrfC Protein, a Nucleoid Partition Factor, Localizes to Nucleoid Poles via the Activities of Specific Nucleoid-Associated Proteins
Source: PubMed Central journal article supplement (PMC6374313; doi:10.3389/fmicb.2019.00072), 2019-02-07
Supplement: Data_Sheet_1.pdf [file Data_Sheet_1.pdf]

*Supplementary Material*

***Escherichia coli* CrfC protein, a nucleoid partition factor, localizes to nucleoid poles via the activities of specific nucleoid-associated proteins**

**Saki Taniguchi\*, Kazutoshi Kasho, Shogo Ozaki, Tsutomu Katayama**

**\* Correspondence:** Tsutomu Katayama: [katayama@phar.kyushu-u.ac.jp](mailto:katayama@phar.kyushu-u.ac.jp).

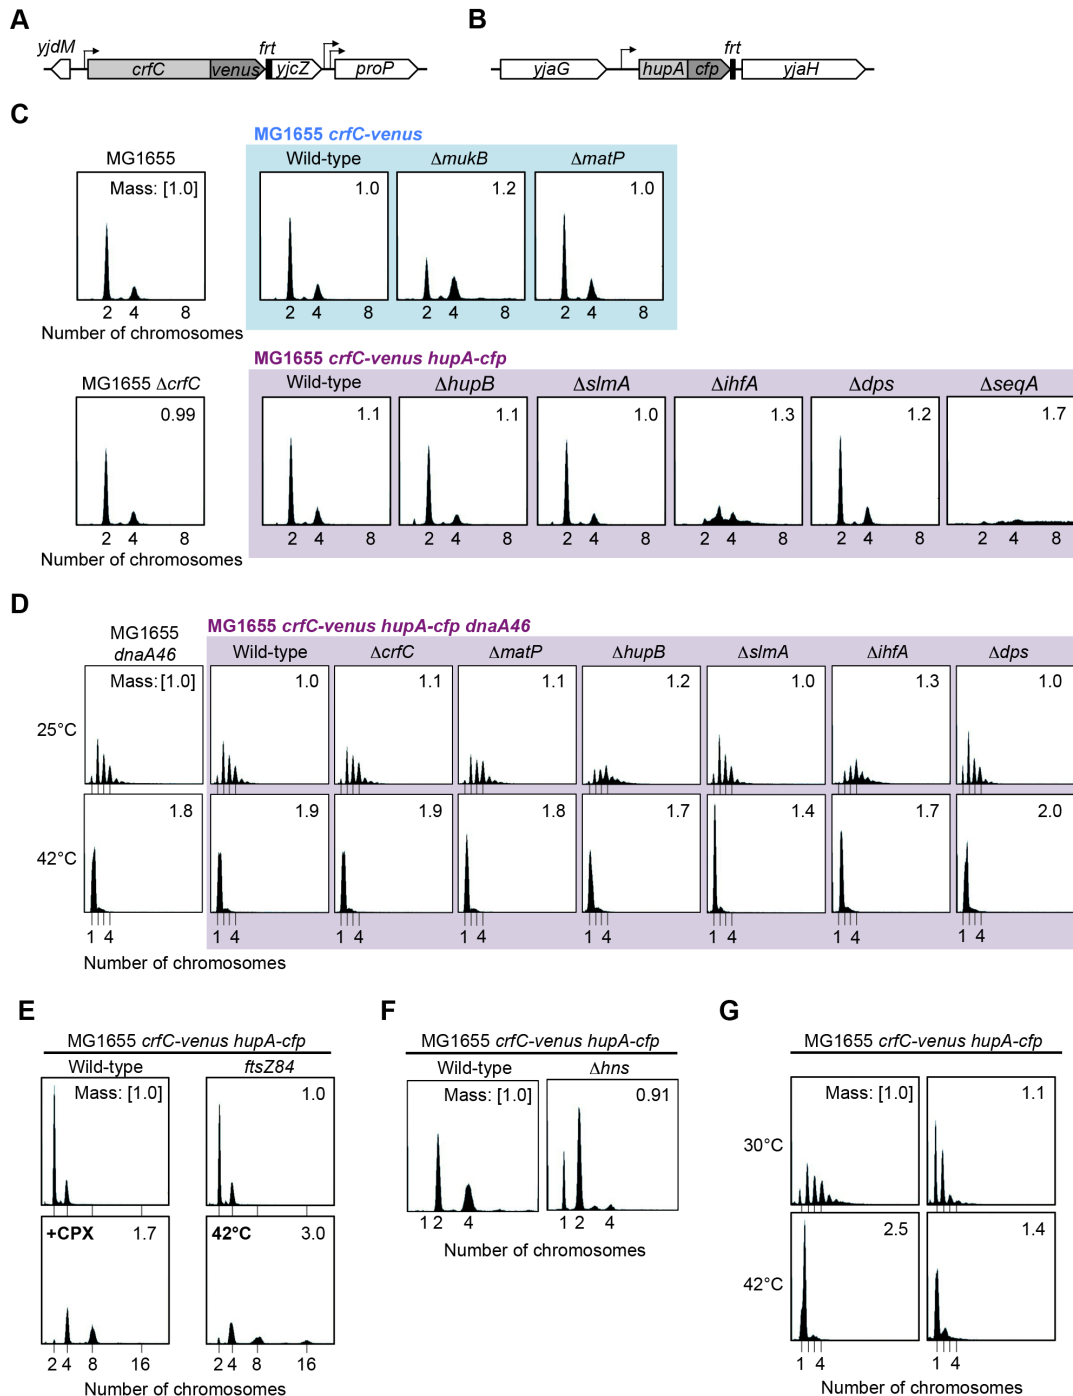

**Supplementary Figure 1.** Flow cytometry analysis of constructed mutants. (A-B) Illustrations of the chromosomal *crfC* region (A) and *hupA* region (B). (C-G) Flow cytometric analysis of MG1655-derivative strains grown at 25, 30 or 42°C in M9glu-*caa* medium. Cells were incubated for an additional 4 hr at the same temperatures in the presence of rifampicin and cephalaxin, followed by analysis on a FACS Calibur instrument as described previously (Keyamura et al., 2007). (C) MECS91-K, expressing Venus-fused CrfC, and its derivatives. (D) *dnaA46* double mutants other than MECS174 (*dnaA46*  $\Delta hns$ ). (E) MECS133-K treated with cephalaxin and MECS150 (MECS133-K *ftsZ84*). (F) MECS171 ( $\Delta hns$ ) grown at 30°C. (G) MECS174 (*dnaA46*  $\Delta hns$ ).

| Phase                                                                             | CrfC                                                                              | $\beta$ Clamp                                                                     | Merge                                                                             |
|-----------------------------------------------------------------------------------|-----------------------------------------------------------------------------------|-----------------------------------------------------------------------------------|-----------------------------------------------------------------------------------|
|  |  |  |  |
| 1-clamp focus cells<br>(A)                                                        | Colocalized cells<br>(B)                                                          |                                                                                   | B/A<br>(%)                                                                        |
| 23                                                                                | 12                                                                                |                                                                                   | 52                                                                                |

**Supplementary Figure 2.** Colocalization of CrfC and  $\beta$  clamp at mid-cell. Colocalization of CrfC-Venus with the mCherry-labeled clamp in single-focus MECS115-K cells. Upper panel: images of fluorescent foci and the morphology of a representative MECS115-K cell, which contained a single-clamp focus colocalized with CrfC focus at mid-cell, is shown. Lower panel: table displaying the percentages of cells containing colocalized foci.

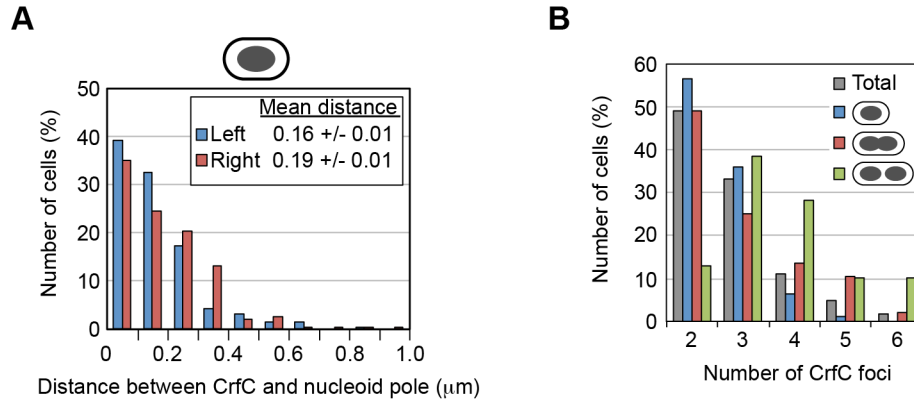

**Supplementary Figure 3.** Subcellular localization of CrfC and nucleoid. (A) Histogram of the distance between CrfC in the cell-polar area and the nucleoid pole in the cells analyzed for Figure 2C. The distance range (max, 1.0  $\mu\text{m}$ ) was divided into ten equal parts, and cells with distances corresponding to each range were scored. “Left” and “Right” indicate each pole of the nucleoid in Figure 2C. (B) Percentages of MECS133-K cells containing the indicated number of CrfC foci. Cells containing a single nucleoid (blue bar), a constricted nucleoid (magenta bar), or two nucleoids (green bar) were analyzed.

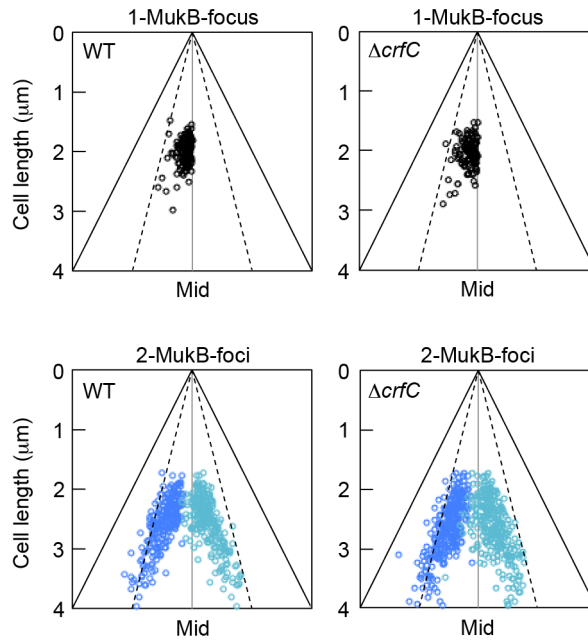

**Supplementary Figure 4.** Subcellular localization of MukB-mCherry foci. Subcellular positioning of MukB in MECS68 (wild-type *crfC*) and MECS83 ( $\Delta crfC$ ) cells. Cells bearing one (upper panel) or two MukB foci (lower panel) were analyzed. Dotted lines indicate quarter-cell positions, and black solid lines indicate the positions of the cell edges. Mid, mid-cell.

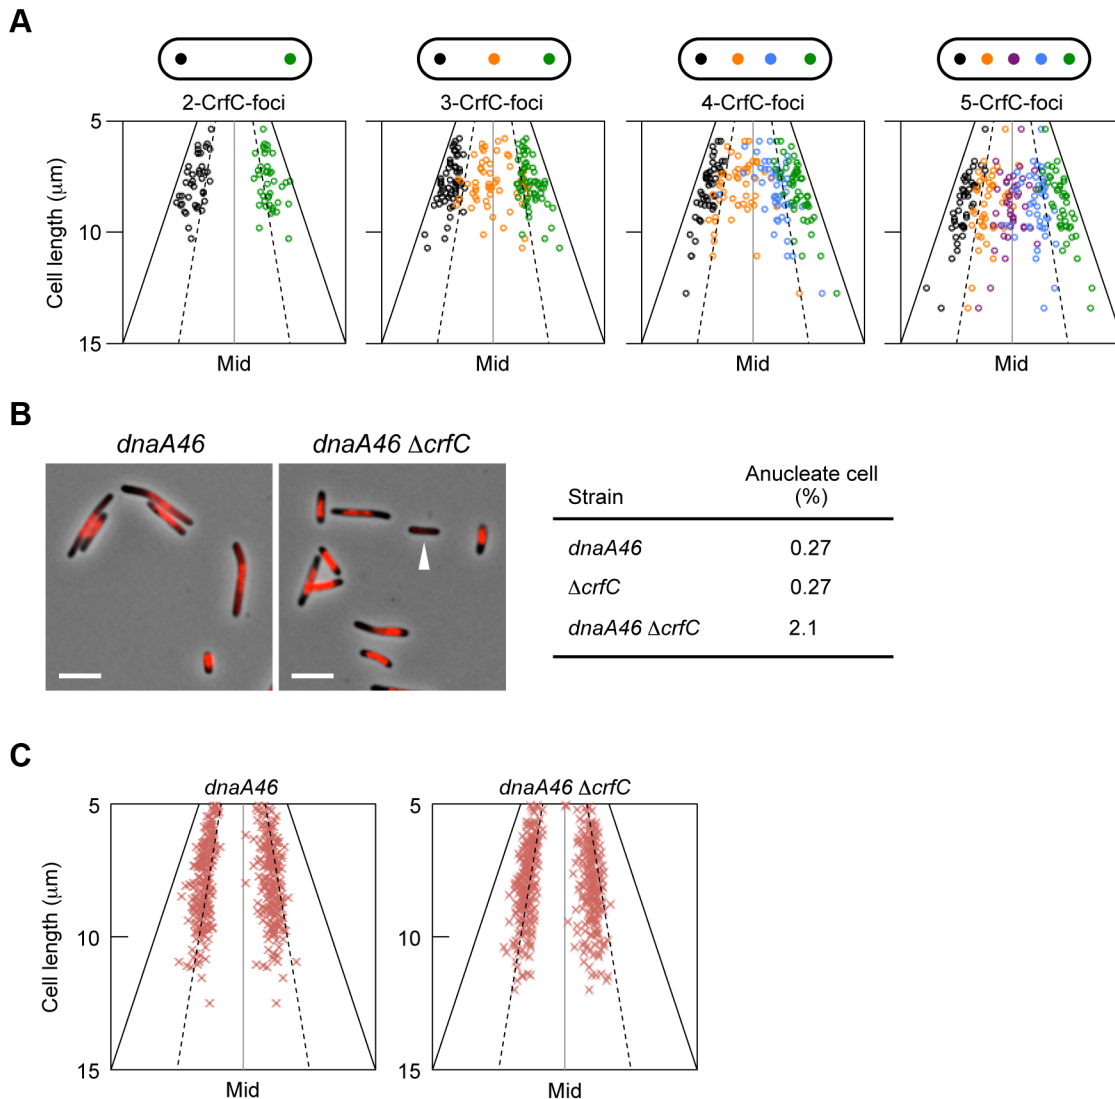

**Supplementary Figure 5.** Subcellular localization of CrfC and nucleoid in *dnaA46* filamentous cells. (A) Subcellular positioning of CrfC in MECS135 (*dnaA46*) filamentous cells bearing two to five CrfC foci. Dotted lines indicate quarter-cell positions, and black solid lines indicate the positions of cell poles. Mid, mid-cell. (B) Anucleate cell production of MECS135 (*dnaA46*) and MECS159 ( $\Delta crfC$  *dnaA46*) mutants grown at 42°C for 2 hr. Left panel: Representative images of fluorescent foci and the morphology of MECS135 (*dnaA46*) and MECS159 ( $\Delta crfC$  *dnaA46*) cells. White arrowhead indicates an anucleate cell. Scale bar is 5  $\mu$ m. Right panel: Proportions of anucleate cells in MECS135 (*dnaA46*), MECS157 ( $\Delta crfC$ ) and MECS159 ( $\Delta crfC$  *dnaA46*) mutants. In total, 366 (MECS135), 2217 (MECS157) or 373 (MECS159) cells were analyzed. (C) Subcellular positioning of the nucleoid poles in MECS135 (left panel) and MECS159 (right panel). Dotted lines indicate quarter-cell positions, and black solid lines indicate the positions of cell poles. Mid, mid-cell.

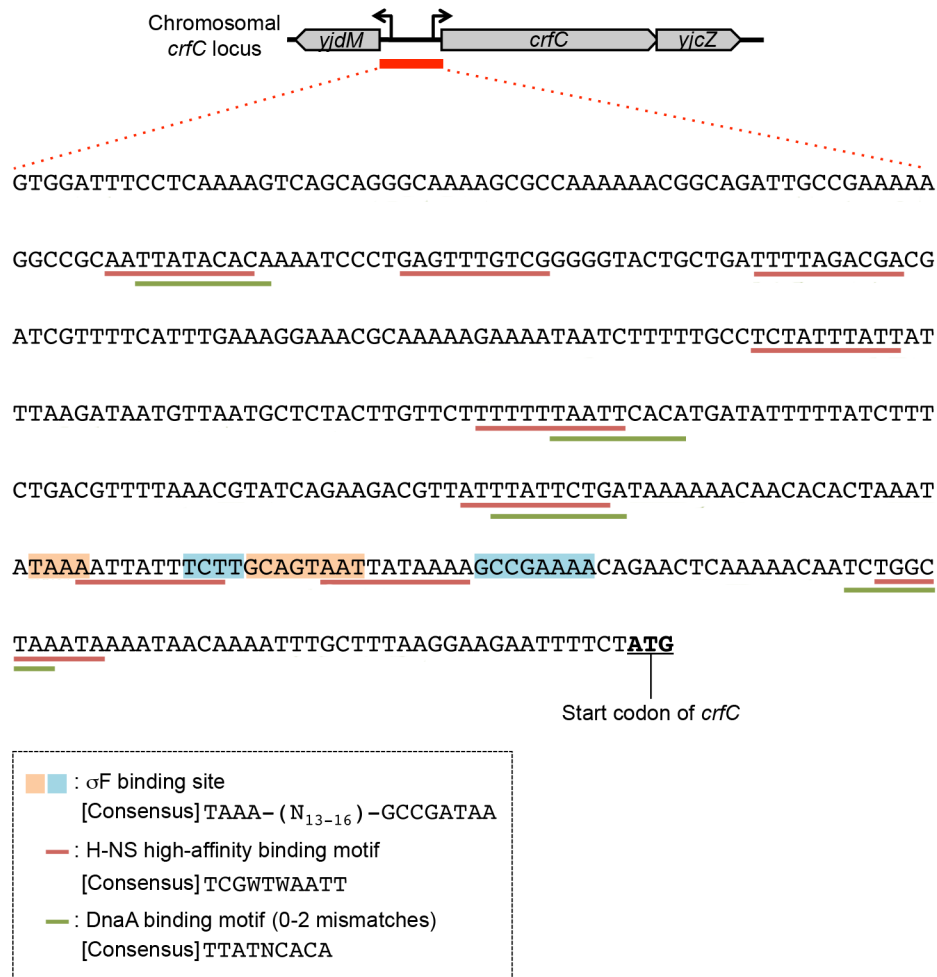

**Supplementary Figure 6.** Characteristics of the promoter region of the *crfC* gene. DNA sequence of the promoter region of the *crfC* gene. The sequence shows the 300 base pairs upstream of the *crfC* start codon (bold and underlined ATG). Orange and blue boxes indicate the consensus sequence for the  $\sigma^F$  (FliA)-binding site (Zhao et al., 2007). Magenta lines indicate the consensus sequence of the high-affinity binding site for H-NS (Lang et al., 2007). Green lines indicate the consensus sequence of DnaA box.

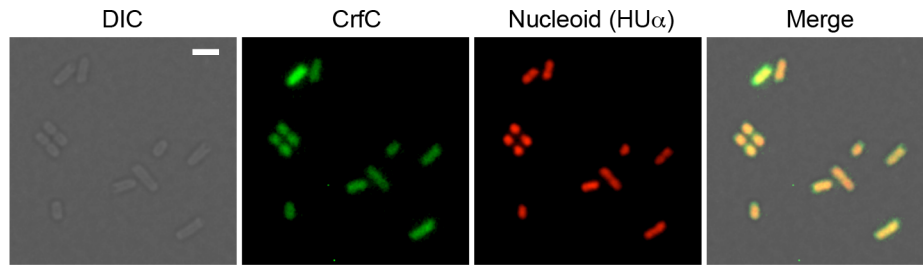

**Supplementary Figure 7.** Subcellular localization of CrfC overexpressed from pBR322 plasmid. Representative images of fluorescent foci and the morphology of MECS157-K ( $\Delta$ *crfC hupA-cfp*) cells bearing pBR-*crfC-venus*. Scale bar is 2  $\mu$ m.



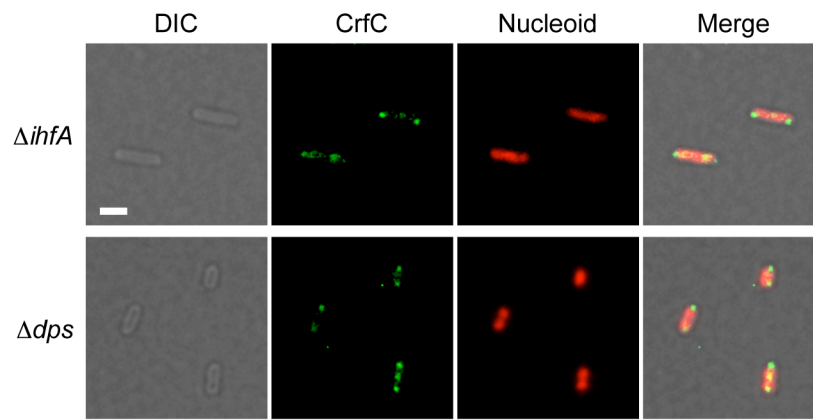

**Supplementary Figure 8.** Subcellular localization of CrfC in  $\Delta dps$  or  $\Delta ihfA$  cells. Representative images of fluorescent foci and the morphology of MECS173 ( $\Delta ihfA$ ) and MECS176 ( $\Delta dps$ ) cells are shown. Scale bar is 2  $\mu$ m.

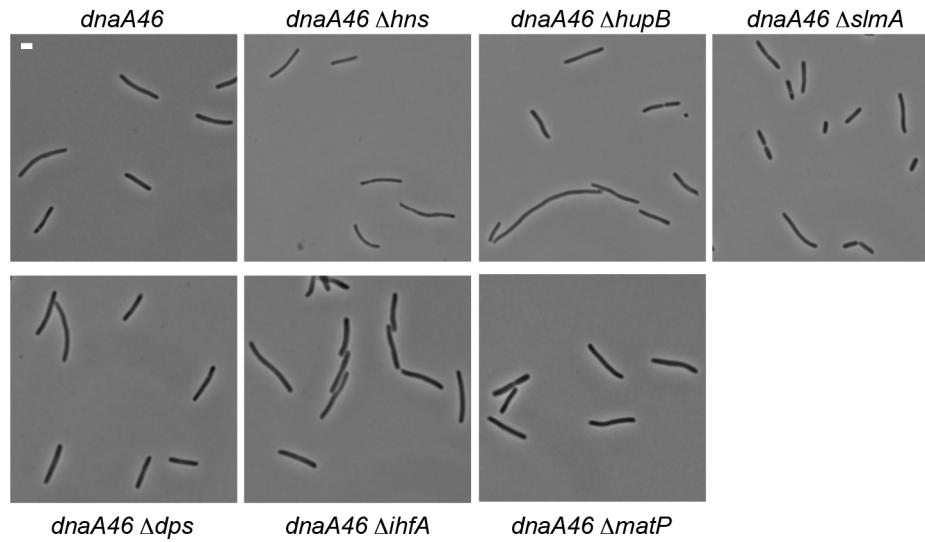

**Supplementary Figure 9.** Cell morphology of *dnaA46* strains. Representative morphological images of *dnaA46* strains [MECS135 (*dnaA46*), MECS174 (*dnaA46 Δhns*), MECS178 (*dnaA46 ΔhupB*), MECS180 (*dnaA46 ΔslmA*), MECS172 (*dnaA46 Δdps*), MECS175 (*dnaA46 ΔihfA*), and MECS160 (*dnaA46 ΔmatP*)] cells incubated at 42°C for 2 hr are shown. Scale bar is 2 μm.

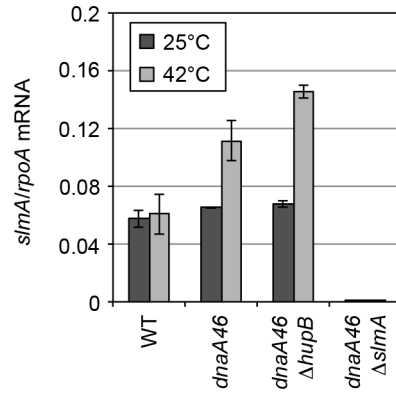

**Supplementary Figure 10.** mRNA level of *slmA* in *dnaA46 ΔhupB* cells. Level of *slmA* mRNA in MECS135 (*dnaA46*) and MECS178 (*dnaA46 ΔhupB*) cells. Cells were grown at 25°C (gray bars) and incubated at 42°C for an additional 2 hr (black bars). Error bars indicate SD (n=2).

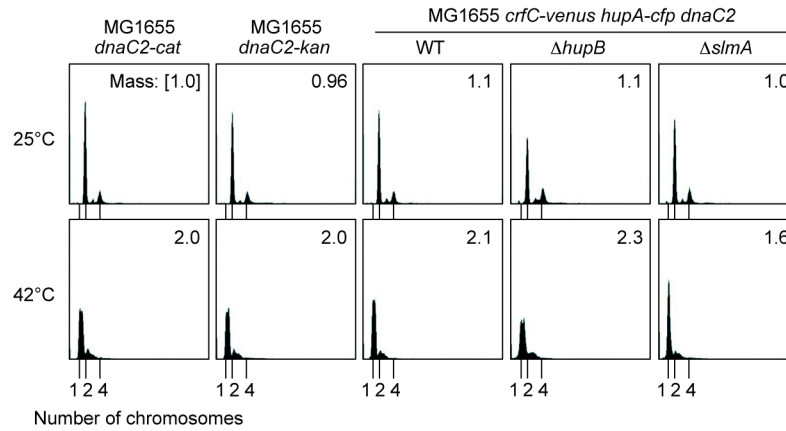

**Supplementary Figure 11.** Flow cytometry analysis of *dnaC2* mutants (KYA018, EYK37, MECS195, MECS196 and MECS197) incubated at 25 or 42°C in M9glu-*caa* medium. Cells were analyzed as described in Supplementary Figure 1.

**Supplementary Table 1.** List of *E. coli* strain

| Strain    | Genotype                                                                                                                                             | Reference                |
|-----------|------------------------------------------------------------------------------------------------------------------------------------------------------|--------------------------|
| MG1655    | <i>ilvG rfb rph thyA rpsL</i> (wild-type)                                                                                                            | Laboratory stock         |
| MYU001-K  | MG1655 $\Delta$ <i>crfC</i>                                                                                                                          | Ozaki et al., 2013       |
| MYU002    | MG1655 $\Delta$ <i>mukB::cat</i>                                                                                                                     | Ozaki et al., 2013       |
| MYU008    | MG1655 $\Delta$ <i>slmA::cat</i>                                                                                                                     | Ozaki et al., 2013       |
| OZA004    | MG1655 <i>frt-kan mCherry-dnaN</i>                                                                                                                   | Ozaki et al., 2013       |
| OZA018    | MG1655 $\Delta$ <i>crfC mCherry-dnaN</i>                                                                                                             | This work                |
| MIT125    | MG1655 <i>dnaA46 tnaA::Tn10</i>                                                                                                                      | Noguchi et al., 2016     |
| MIT147    | MG1655 <i>seqA::Tn10</i>                                                                                                                             | Noguchi et al., 2016     |
| AZ5159    | <i>ftsZ84 leu-63::Tn10</i>                                                                                                                           | Kurokawa et al., 1999    |
| JW0939    | <i>rrnB <math>\Delta</math>lacZ4787 hsdR514 <math>\Delta</math>(araBAD)567 <math>\Delta</math>(rhaBAD)568 rph-1 <math>\Delta</math>matP::frt-kan</i> | Keio collection, NIG     |
| KMG5      | MG1655 $\Delta$ <i>ihfA::frt-kan</i>                                                                                                                 | Kasho et al., 2014       |
| KMG8      | MG1655 $\Delta$ <i>hupB::frt-kan</i>                                                                                                                 | This work                |
| KMG10     | MG1655 $\Delta$ <i>dps::frt-kan</i>                                                                                                                  | This work                |
| KX181     | MG1655 $\Delta$ <i>hns::frt-kan</i>                                                                                                                  | This work                |
| KYA018    | MG1655 <i>dnaC2 zji-18::cat</i>                                                                                                                      | Kasho and Katayama, 2013 |
| EYK37     | MG1655 <i>dnaC2 zji-18::kan</i>                                                                                                                      | This work                |
| MECS68    | MG1655 <i>mukB-mCherry frt-kan</i>                                                                                                                   | This work                |
| MECS83    | MG1655 $\Delta$ <i>crfC mukB-mCherry frt-kan</i>                                                                                                     | This work                |
| MECS91-K  | MG1655 <i>crfC-venus</i>                                                                                                                             | This work                |
| MECS111-K | MG1655 <i>crfC-venus mukB-mCherry</i>                                                                                                                | This work                |
| MECS114   | MG1655 <i>crfC-venus <math>\Delta</math>mukB::cat</i>                                                                                                | This work                |
| MECS115-K | MG1655 <i>crfC-venus mCherry-dnaN</i>                                                                                                                | This work                |
| MECS129   | MG1655 <i>hupA-cfp frt-kan</i>                                                                                                                       | This work                |
| MECS133-K | MG1655 <i>crfC-venus hupA-cfp</i>                                                                                                                    | This work                |
| MECS135   | MG1655 <i>crfC-venus hupA-cfp dnaA46 tnaA::Tn10</i>                                                                                                  | This work                |
| MECS145   | MG1655 <i>crfC-venus <math>\Delta</math>matP::frt-kan</i>                                                                                            | This work                |
| MECS150   | MG1655 <i>crfC-venus hupA-cfp ftsZ84 leu-63::Tn10</i>                                                                                                | This work                |
| MECS157   | MG1655 $\Delta$ <i>crfC hupA-cfp</i>                                                                                                                 | This work                |
| MECS159   | MG1655 $\Delta$ <i>crfC hupA-cfp dnaA46 tnaA::Tn10</i>                                                                                               | This work                |
| MECS160   | MG1655 <i>crfC-venus hupA-cfp <math>\Delta</math>matP::frt-kan dnaA46 tnaA::Tn10</i>                                                                 | This work                |
| MECS171   | MG1655 <i>crfC-venus hupA-cfp <math>\Delta</math>hns::frt-kan</i>                                                                                    | This work                |
| MECS172   | MG1655 <i>crfC-venus hupA-cfp <math>\Delta</math>dps::frt-kan dnaA46 tnaA::Tn10</i>                                                                  | This work                |
| MECS173   | MG1655 <i>crfC-venus hupA-cfp <math>\Delta</math>ihfA::frt-kan</i>                                                                                   | This work                |
| MECS174   | MG1655 <i>crfC-venus hupA-cfp <math>\Delta</math>hns::frt-kan dnaA46 tnaA::Tn10</i>                                                                  | This work                |
| MECS175   | MG1655 <i>crfC-venus hupA-cfp <math>\Delta</math>ihfA::frt-kan dnaA46 tnaA::Tn10</i>                                                                 | This work                |
| MECS176   | MG1655 <i>crfC-venus hupA-cfp <math>\Delta</math>dps::frt-kan</i>                                                                                    | This work                |

(Supplementary Table 1. continued)

| Strain    | Genotype                                                           | Reference |
|-----------|--------------------------------------------------------------------|-----------|
| MECS177   | MG1655 <i>crfC-venus hupA-cfp ΔslmA::frt-kan</i>                   | This work |
| MECS178   | MG1655 <i>crfC-venus hupA-cfp ΔslmA::frt-kan dnaA46 tnaA::Tn10</i> | This work |
| MECS179   | MG1655 <i>crfC-venus hupA-cfp ΔhupB::frt-kan</i>                   | This work |
| MECS179-K | MG1655 <i>crfC-venus hupA-cfp ΔhupB</i>                            | This work |
| MECS180   | MG1655 <i>crfC-venus hupA-cfp ΔhupB::frt-kan dnaA46 tnaA::Tn10</i> | This work |
| MECS193   | MG1655 <i>crfC-venus hupA-cfp seqA::Tn10</i>                       | This work |
| MECS195   | MG1655 <i>crfC-venus hupA-cfp dnaC2 zjj-18::cat</i>                | This work |
| MECS196   | MG1655 <i>crfC-venus hupA-cfp ΔhupB dnaC2 zjj-18::cat</i>          | This work |
| MECS197   | MG1655 <i>crfC-venus hupA-cfp ΔslmA::cat dnaC2 zjj-18::kan</i>     | This work |

**Supplementary Table 2.** List of plasmids

| Plasmid                | Description               | Reference             |
|------------------------|---------------------------|-----------------------|
| pTH59                  | <i>cfp-frm-kan</i>        | Hatano and Niki, 2010 |
| pTH1017                | <i>venus-frm-kan</i>      | Gift from H. Niki     |
| pTH1161                | <i>mCherry-frm-kan</i>    | Ozaki et al., 2013    |
| pBR- <i>crfC-venus</i> | pBR322- <i>crfC-venus</i> | This work             |

**Supplementary Table 3.** Sequences of PCR primers

| Name      | Sequence (5' to 3')                                           |
|-----------|---------------------------------------------------------------|
| SP123     | AACGCTTCCAGGAACTGACGAAGCGCCTTCTCAGGCGAGTATGGTGAGCAAGGGCGAGGAG |
| SP124     | TTTCGGAAAAAGAAAAGGCGGCATTGCTGCCGCCTAATTGTGTAGGCTGGAGCTGCTTC   |
| SP140     | CGATGATATTCAAACACTTTTCACGGCAGAACGATATGTGAGCAAGGGCGAGGAGCT     |
| SP186     | AAACCACCCCTTCGTTAAAACCTGTTCACTGCCACGCAATCGTGTAGGCTGGAGCTGCTTC |
| SP190     | ATTTGTTTCTGGCAAGGCACTGAAAGACGCAGTTAAGGTGAGCAAGGGCGAGGAGCT     |
| GFP-b     | GACTCCAGCACGCGACCGGGGCCGTCAAGTAACGTCTTGGGTGTAGGCTGGAGCTGCTTC  |
| RT-rpoA-L | CCCAGAGTATGGCCAAAGCC                                          |
| RT-rpoA-U | CTGTGACAGAGTTTCTAAAACCGC                                      |
| SP234     | TGGCTTTACCCTGGAGTCAG                                          |
| SP235     | TGGTTGATTCCCTGCTTTC                                           |
| SP256     | CAAACTGGCCGCCTCTGTC                                           |
| SP257     | CTTTCAGAATCAGGTTGATGCGAG                                      |
